# Supplementary material for: Exploring Digital Health Use and Opinions of University Students: Field Survey Study
Source: PubMed Central journal article supplement (PMC5876492; doi:10.2196/mhealth.9131), 2018-03-15
Supplement: mhealth_v6i3e65_app1.pdf [file mhealth_v6i3e65_app1.pdf]

## MULTIMEDIA APPENDIX 1

Table A. Distribution of students at the University of Bordeaux (N=70,000) and in our study (N=507) according to gender and field of study

|                                       | University of Bordeaux |                |               |                |               |               | Our Study  |                |            |                |            |               |
|---------------------------------------|------------------------|----------------|---------------|----------------|---------------|---------------|------------|----------------|------------|----------------|------------|---------------|
|                                       | Female                 |                | Male          |                | Total         |               | Female     |                | Male       |                | Total      |               |
| <b>Law and Economy</b>                | 12,833                 | (55.6%)        | 9,333         | (44.4%)        | 22,167        | (31.6%)       | 85         | (58.2%)        | 61         | (41.8%)        | 146        | (28.8%)       |
| <b>Life and Health Sciences</b>       | 15,167                 | (65.0%)        | 8,167         | (35.0%)        | 23,333        | (33.4%)       | 115        | (63.5%)        | 66         | (36.5%)        | 181        | (35.7%)       |
| <b>Literature and Social Sciences</b> | 8,167                  | (70.0%)        | 3,500         | (30.0%)        | 11,667        | (16.7%)       | 69         | (75.8%)        | 22         | (24.2%)        | 91         | (17.9%)       |
| <b>Science and Technology</b>         | 4,667                  | (36.4%)        | 8,167         | (63.6%)        | 12,833        | (18.3%)       | 33         | (37.1%)        | 56         | (62.9%)        | 89         | (17.6%)       |
| <b>Total</b>                          | <b>40,833</b>          | <b>(58.3%)</b> | <b>29,167</b> | <b>(41.7%)</b> | <b>70,000</b> | <b>(100%)</b> | <b>302</b> | <b>(59.5%)</b> | <b>205</b> | <b>(40.5%)</b> | <b>507</b> | <b>(100%)</b> |

Female students of our sample were 302 (59.5%) vs 40,833 in the University of Bordeaux (58.3%); students in Literature and Social Sciences were 91 (17.9%) vs 11,667 (16.7%); students in Life and Health Sciences were 181 (35.7%) vs 23,333 (33.4%); students in Science and Technology were 89 (17.6%) vs 12,833 (18.3%); students in Law and Economy were 146 (28.8%) vs 22,167 (31.6%).
