# Supplementary material for: Exploring Digital Health Use and Opinions of University Students: Field Survey Study
Source: PubMed Central journal article supplement (PMC5876492; doi:10.2196/mhealth.9131), 2018-03-15
Supplement: mhealth_v6i3e65_app2.pdf [file mhealth_v6i3e65_app2.pdf]

MULTIMEDIA APPENDIX 2 - ENGLISH VERSION OF THE QUESTIONNAIRE

Questionnaire Code

Date

Nome

Campus

**Your use and opinions of digital health**

**SECTION 1: Who are you?**

1. **Gender:** Male/Female
2. **Which are your month and year of birth?**
3. **Which is your field of study?**

Science and Technology

Literature and Social Sciences

Law and Economy

Life and Health Sciences

4. **Which is your current year of study?**

1<sup>st</sup> year

2<sup>nd</sup> year

3<sup>rd</sup> year

> 3<sup>rd</sup> year

5. **How would you rate your general health status?**

Very good

Good

Average

Bad

Very bad

6. **And what about your mental health?**

Very good

Good

Average

Bad

Very bad

## **SECTION 2: Use of digital health**

**7. Do you have a smartphone?**

Yes

No (*Go to question 11*)

**8. Do you have a health-related application (nutrition, running, sleep, well-being...) ?**

Yes

No (*Go to question 11*)

**9. If yes, please provide the name**

**10. Which is your frequency of use?**

Often

Occasionally

Never

**11. Do you have a health-related wearable device like a bracelet or a smartwatch?**

Yes

No

**12. During the last 12 months, have you looked for online information or support on these health and well-being topics? (MULTIPLE CHOICE)**

| <b>Topics</b>                                                                | <b>YES</b>                                                                                  |                         |                         | <b>NO</b> |
|------------------------------------------------------------------------------|---------------------------------------------------------------------------------------------|-------------------------|-------------------------|-----------|
|                                                                              | <i>For yourself concerning a specific disease or medical problem which might affect you</i> | <i>Out of curiosity</i> | <i>For your studies</i> |           |
| Sleep                                                                        |                                                                                             |                         |                         |           |
| Physical activity and its repercussion on health                             |                                                                                             |                         |                         |           |
| Nutrition (weight, health habits, eating disorders, food composition)        |                                                                                             |                         |                         |           |
| Sexuality (sexual habits, homosexuality, sexually transmitted diseases, HIV) |                                                                                             |                         |                         |           |
| Contraception (condom, pill, IUD, implant)                                   |                                                                                             |                         |                         |           |
| Pregnancy and/or maternity                                                   |                                                                                             |                         |                         |           |
| Alcohol risks                                                                |                                                                                             |                         |                         |           |
| Risks concerning tobacco and e-cigarettes                                    |                                                                                             |                         |                         |           |
| Cannabis and other synthetic drugs                                           |                                                                                             |                         |                         |           |
| <b>Stress/anxiety/depression</b>                                             |                                                                                             |                         |                         |           |
| Skin problems                                                                |                                                                                             |                         |                         |           |
| Vaccinations                                                                 |                                                                                             |                         |                         |           |
| Environment and health risks                                                 |                                                                                             |                         |                         |           |
| Pain and illnesses                                                           |                                                                                             |                         |                         |           |
| Other topics:                                                                |                                                                                             |                         |                         |           |

*\* If a student answers NO to all items, do not administer the questions underlined in grey.*

**13. What are the sources of information you explored? How do you rate the information found?**

|                                     | YES                  |                                              |                          | NO |
|-------------------------------------|----------------------|----------------------------------------------|--------------------------|----|
|                                     | Credible information | Neither credible or non-credible information | Non-credible information |    |
| Forums                              |                      |                                              |                          |    |
| General health websites             |                      |                                              |                          |    |
| YouTube                             |                      |                                              |                          |    |
| Social networks (Facebook, Twitter) |                      |                                              |                          |    |
| Institutional/official websites     |                      |                                              |                          |    |
| Blogs                               |                      |                                              |                          |    |
| Wikipedia                           |                      |                                              |                          |    |

14. Since the beginning of your university studies have you already looked online for a health professional/service (ex. general practitioner, dentist, gynaecologist)?

- Yes
- No

### SECTION 3: Opinions on digital health

15. You have declared that you have already looked for health-related information online for a personal problem. Has this resulted in a consultation with a health professional/service?

- Yes
- No

15.1. If YES, why? (MULTIPLE CHOICE)

- Information was insufficient
- Information was alarming
- Information confirmed a real health problem

15.2. If NO, why? (MULTIPLE CHOICE)

- Information was sufficient
- Information was reassuring

**16. Do you think online information and advice can be a complementary solution to real-life consultations?**

Yes

No

**16.1. If YES, when could they be most useful?**

Before a consultation to get prepared

After a consultation to better understand the health professional's instructions

Before and after a consultation

**17. Do you think online information and advice could be an alternative to real-life consultations now or in the future?**

Strongly agree

Agree

Disagree

Strongly disagree

**17.1. If DISAGREE/STRONGLY DISAGREE, do you think this will be possible in the future (for instance through a validated website by the ministry of health)?**

Yes

No
